# Supplementary material for: Phosphorus recovery and recycling – closing the loop
Source: Royal Society of Chemistry journal article supplement (doi:10.1039/d0cs01150a), 2020-11-19
Supplement: d0cs01150a1.pdf [file d0cs01150a1.pdf]

## Supplementary Information

### *Phosphorus Recovery and Recycling – Closing the Loop*

Andrew R. Jupp, Steven Beijer, Ganesha C. Narain, Willem Schipper and J. Chris Sootweg

Table S1: Solubility products of relevant phosphate salts

| Material speciation                                | pK <sub>so</sub>  |
|----------------------------------------------------|-------------------|
| Ca <sub>5</sub> (PO <sub>4</sub> ) <sub>3</sub> OH | 55.9 <sup>1</sup> |
| Fe <sub>3</sub> (PO <sub>4</sub> ) <sub>2</sub>    | 29.0 <sup>2</sup> |
| Ca <sub>3</sub> (PO <sub>4</sub> ) <sub>2</sub>    | 24.0 <sup>1</sup> |
| FePO <sub>4</sub>                                  | 21.9 <sup>1</sup> |
| AlPO <sub>4</sub>                                  | 21.0 <sup>1</sup> |
| MgNH <sub>4</sub> PO <sub>4</sub>                  | 13.3 <sup>3</sup> |
| CaHPO <sub>4</sub>                                 | 6.66 <sup>1</sup> |
| Ca(H <sub>2</sub> PO <sub>4</sub> ) <sub>2</sub>   | 1.14 <sup>1</sup> |

Table S2: Temperature ranges and oxygen profiles for thermochemical sewage sludge treatments<sup>4,5</sup>

| Method       | Temperature range (°C) | Oxygen profile                |
|--------------|------------------------|-------------------------------|
| Hydrothermal | 180–300                | Ambient                       |
| Pyrolysis    | 300–700                | Anoxic - low                  |
| Gasification | 600–900                | 20–40% ambient O <sub>2</sub> |

## References

1. V. L. Snoeyink, and D. Jenkins, *Water Chemistry*, Wiley, 1980, 298-315.
2. P. J. Chen and S. D. Faust, *Env. Letters*, 1974, **6**, 287-296.
3. K. N. Ohlinger, T. M. Young and E. D. Schroeder, *Water Res.*, 1998, **32**, 3607-3614.
4. D. Huygens, H. Saveyn, D. Tonini, P. Eder and L. Delgado Sancho, *Technical proposals for selected new fertilising materials under the Fertilising Products Regulation (Regulation (EU) 2019/1009): process and quality criteria, and assessment of environmental and market impacts for precipitated phosphate salts & derivatives, thermal oxidation materials & derivatives and pyrolysis & gasification materials*, Publications Office of the European Union, 2019.
5. X. Meng, Q. Huang, J. Xu, H. Gao and J. Yan, *Waste Disposal & Sustain. Energy*, 2019, **1**, 99–115.
